# Supplementary material for: Catheter ablation vs. antiarrhythmic drug treatment of persistent atrial fibrillation: a multicentre, randomized, controlled trial (SARA study)
Source: PubMed Central journal article supplement — Eur Heart J. 2013 Oct 17;35(8):501–7. doi: 10.1093/eurheartj/eht457 (PMC3930872; doi:10.1093/eurheartj/eht457), 2013-10-17
Supplement: supp_eht457_eht457supp.pdf [file supp_eht457_eht457supp.pdf]

## Supplemental Material

### Appendix

#### **The following investigators also participated in the SARA trial:**

Hospital Clínic, Barcelona, Spain: Naiara Calvo MD, Antonio Berruezo MD PhD, Elena Arbelo MD PhD and José María Tolosana MD; Hospital Ramón y Cajal, Madrid, Spain: Concepción Moro MD and José Luis Zamorano, MD; Hospital de la Santa Creu i Sant Pau, Barcelona, Spain: Concepción Alonso-Martín MD PhD and Enrique Rodríguez-Font MD PhD; Hospital Clínico San Carlos, Madrid, Spain: Javier Moreno, MD PhD and Roberto Fernández MD; Hospital 12 de Octubre, Madrid, Spain: Adolfo Fontenla MD and Marta de Riva MD; Hospital Puerta de Hierro, Madrid, Spain: Jorge Toquero MD and Elena Perez-Pereira MD.

**Steering committee:** Lluís Mont, MD PhD (Hospital Clínic, Barcelona, Spain), Julián Villacastín, MD PhD (Hospital Clínico San Carlos, Madrid, Spain), Ángel Arenal, MD PhD (Hospital Gregorio Marañón, Madrid, Spain) and Josep Brugada, MD PhD (Hospital Clínic, Barcelona, Spain).

**Endpoint committee:** Angel Moya, MD PhD (Arrhythmia Unit, Hospital Vall d'Hebron, Barcelona, Spain) and Ignasi Anguera, MD PhD (Arrhythmia Unit, Hospital Universitari de Bellvitge, Barcelona, Spain).

**Safety Committee:** Ginés Sanz, MD PhD (Centro Nacional de Investigación Cardiovascular – CNIC, Madrid).

**Statistical analysis:** Albert Cobos, PhD (Saalig Clinical, SL – Barcelona, Spain)

**Data management (CRO):** Mariona Cardona, MD (Anagram-ESIC, Barcelona, Spain).
